# Supplementary material for: Projected long-term effects of colorectal cancer screening disruptions following the COVID-19 pandemic
Source: eLife. 2023 May 2;12:e85264. doi: 10.7554/eLife.85264 (PMC10154022; doi:10.7554/eLife.85264)
Supplement: Supplementary file 1. [file elife-85264-supp1.xlsx]

## Sheet: Sup. Table 1 - LYG
Supplementary Table 1 - Projected Lifetime Life-years (LY) per 1,000 individuals
Notes: Outcomes calculated over the lifetime of a cohort of 1000 average-risk, CRC-free individuals with age at pandemic defined in the scenario description. The scenario column describes colorectal cancer screening disruption scenarios, as presented in Table 1. Life-years (LY) and Life-years gained (LYG) are computed over the remaining lifespan of individuals starting at the beginning of 2020. A…
Colonoscopy sensitivity	Scenario	Model	No screening	Screening without disruptions		Screening with disruptions		Loss due to disruptions
			LY [a]	LY [b]	LYG [b-a]	LY [c]	LYG [c-a]	LY [b-c]	% LYG Loss [(b-c)/b]
High	U50 | C3m	CRCSPIN	31595	31893	299	31892	297	2	1
		MISCAN	31222	31494	273	31491	270	3	1
	U50 | C9m	CRCSPIN	31595	31893	299	31890	295	3	1
		MISCAN	31222	31494	273	31490	268	5	2
	U50 | C18m	CRCSPIN	31595	31893	299	31886	291	7	2
		MISCAN	31222	31494	273	31488	266	6	2
	U50 | C@65	CRCSPIN	31595	31893	299	31766	172	127	43
		MISCAN	31222	31494	273	31390	169	104	38
	U50 | F3m	CRCSPIN	31595	31866	271	31865	270	1	0
		MISCAN	31222	31483	261	31481	259	1	1
	U50 | F9m	CRCSPIN	31595	31866	271	31862	268	3	1
		MISCAN	31222	31483	261	31480	258	2	1
	U50 | F18m	CRCSPIN	31595	31866	271	31858	264	7	3
		MISCAN	31222	31483	261	31478	256	5	2
	U60 | C3m	CRCSPIN	23336	23557	221	23560	224	-3	-1
		MISCAN	23114	23309	195	23304	190	5	3
	U60 | C9m	CRCSPIN	23336	23557	221	23555	219	2	1
		MISCAN	23114	23309	195	23301	187	8	4
	U60 | C18m	CRCSPIN	23336	23557	221	23547	211	10	4
		MISCAN	23114	23309	195	23296	182	14	7
	U60 | C@65	CRCSPIN	23336	23557	221	23512	176	45	20
		MISCAN	23114	23309	195	23267	153	42	21
	U60 | F3m	CRCSPIN	23336	23528	191	23529	193	-2	-1
		MISCAN	23114	23291	177	23288	174	3	1
	U60 | F9m	CRCSPIN	23336	23528	191	23525	189	2	1
		MISCAN	23114	23291	177	23285	171	6	3
	U60 | F18m	CRCSPIN	23336	23528	191	23519	183	8	4
		MISCAN	23114	23291	177	23280	166	11	6
	C60 | C3m	CRCSPIN	23243	23541	298	23541	299	0	0
		MISCAN	23077	23320	243	23318	241	2	1
	C60 | C9m	CRCSPIN	23242	23541	298	23541	299	0	0
		MISCAN	23077	23319	243	23317	240	2	1
	C60 | C18m	CRCSPIN	23242	23541	298	23540	298	0	0
		MISCAN	23077	23320	243	23317	239	3	1
	C60 | F3m	CRCSPIN	23242	23541	298	23532	289	9	3
		MISCAN	23077	23320	243	23310	233	10	4
	C60 | F9m	CRCSPIN	23243	23541	298	23532	289	9	3
		MISCAN	23077	23319	243	23310	233	9	4
	C60 | F18m	CRCSPIN	23243	23541	298	23532	289	9	3
		MISCAN	23077	23320	243	23309	232	11	4
	C60 | C@65	CRCSPIN	23243	23541	298	23538	295	3	1
		MISCAN	23077	23320	243	23308	231	11	5
	C60 | U	CRCSPIN	23243	23541	298	23435	192	106	36
		MISCAN	23077	23320	243	23195	118	125	51
	F60 | F3m	CRCSPIN	23307	23579	272	23576	269	3	1
		MISCAN	23144	23377	234	23377	233	0	0
	F60 | F9m	CRCSPIN	23306	23578	272	23575	269	3	1
		MISCAN	23143	23376	234	23376	234	0	0
	F60 | F18m	CRCSPIN	23307	23578	272	23573	267	5	2
		MISCAN	23143	23377	234	23376	233	1	0
	F60 | U	CRCSPIN	23307	23579	272	23467	160	111	41
		MISCAN	23143	23376	234	23283	141	93	40
	f60 | F3m	CRCSPIN	23314	23562	249	23560	247	2	1
		MISCAN	23136	23355	219	23353	217	2	1
	f60 | F9m	CRCSPIN	23314	23563	249	23559	245	4	1
		MISCAN	23136	23355	219	23352	216	3	1
	f60 | F18m	CRCSPIN	23313	23562	249	23556	242	6	3
		MISCAN	23136	23355	219	23350	214	5	2
	f60 | U	CRCSPIN	23313	23562	249	23419	105	143	58
		MISCAN	23134	23353	219	23203	68	150	69
	U70 | C3m	CRCSPIN	15973	16102	128	16099	126	3	2
		MISCAN	15748	15866	117	15857	108	9	8
	U70 | C9m	CRCSPIN	15973	16102	128	16094	120	8	6
		MISCAN	15748	15866	117	15852	103	14	12
	U70 | C18m	CRCSPIN	15973	16102	128	16086	113	16	12
		MISCAN	15748	15866	117	15845	97	21	18
	U70 | C@75	CRCSPIN	15973	16102	128	16052	79	50	39
		MISCAN	15748	15866	117	15815	66	51	43
	U70 | F3m	CRCSPIN	15973	16069	95	16067	93	2	2
		MISCAN	15748	15840	92	15833	85	7	8
	U70 | F9m	CRCSPIN	15973	16069	95	16063	90	5	6
		MISCAN	15748	15840	92	15830	81	10	11
	U70 | F18m	CRCSPIN	15973	16069	95	16058	84	11	12
		MISCAN	15748	15840	92	15824	76	16	17
	C70 | C3m	CRCSPIN	15683	15968	285	15968	285	0	0
		MISCAN	15590	15824	234	15823	234	1	0
	C70 | C9m	CRCSPIN	15683	15968	285	15968	285	0	0
		MISCAN	15590	15824	234	15823	233	1	0
	C70 | C18m	CRCSPIN	15684	15969	285	15968	285	0	0
		MISCAN	15589	15824	234	15822	233	2	1
	C70 | C@75	CRCSPIN	15683	15968	285	15968	285	0	0
		MISCAN	15590	15824	234	15819	229	5	2
	C70 | F3m	CRCSPIN	15683	15968	285	15964	281	5	2
		MISCAN	15590	15824	234	15818	228	6	3
	C70 | F9m	CRCSPIN	15683	15968	285	15964	281	4	1
		MISCAN	15590	15824	234	15817	228	7	3
	C70 | F18m	CRCSPIN	15683	15968	285	15964	281	4	2
		MISCAN	15589	15824	234	15817	227	7	3
	C70 | U	CRCSPIN	15683	15968	285	15930	247	38	13
		MISCAN	15581	15815	234	15726	146	89	38
	F70 | F3m	CRCSPIN	15764	16024	259	16023	259	0	0
		MISCAN	15676	15902	226	15902	226	0	0
	F70 | F9m	CRCSPIN	15765	16024	259	16023	259	1	0
		MISCAN	15677	15903	226	15903	225	1	0
	F70 | F18m	CRCSPIN	15766	16025	259	16024	258	1	0
		MISCAN	15677	15903	226	15903	226	0	0
	F70 | U	CRCSPIN	15764	16024	259	15990	226	33	13
		MISCAN	15677	15903	226	15873	196	30	13
Low	U50 | C3m	CRCSPIN	31595	31867	273	31867	273	0	0
		MISCAN	31222	31471	250	31468	246	3	1
	U50 | C9m	CRCSPIN	31595	31867	273	31866	271	2	1
		MISCAN	31222	31471	250	31467	245	5	2
	U50 | C18m	CRCSPIN	31595	31867	273	31861	267	6	2
		MISCAN	31222	31471	250	31465	243	7	3
	U50 | C@65	CRCSPIN	31595	31867	273	31751	156	117	43
		MISCAN	31222	31471	250	31377	156	94	38
	U50 | F3m	CRCSPIN	31595	31843	249	31843	248	0	0
		MISCAN	31222	31465	243	31464	242	1	1
	U50 | F9m	CRCSPIN	31595	31843	249	31841	246	2	1
		MISCAN	31222	31465	243	31462	241	3	1
	U50 | F18m	CRCSPIN	31595	31843	249	31837	242	6	2
		MISCAN	31222	31465	243	31460	239	5	2
	U60 | C3m	CRCSPIN	23336	23537	201	23539	203	-2	-1
		MISCAN	23114	23294	180	23289	175	5	3
	U60 | C9m	CRCSPIN	23336	23537	201	23535	199	2	1
		MISCAN	23114	23294	180	23286	172	8	4
	U60 | C18m	CRCSPIN	23336	23537	201	23528	192	9	4
		MISCAN	23114	23294	180	23281	167	13	7
	U60 | C@65	CRCSPIN	23336	23537	201	23496	160	41	20
		MISCAN	23114	23294	180	23256	142	38	21
	U60 | F3m	CRCSPIN	23336	23511	175	23513	177	-2	-1
		MISCAN	23114	23280	166	23277	163	3	2
	U60 | F9m	CRCSPIN	23336	23511	175	23509	173	2	1
		MISCAN	23114	23280	166	23275	161	6	3
	U60 | F18m	CRCSPIN	23336	23511	175	23504	168	7	4
		MISCAN	23114	23280	166	23270	156	11	6
	C60 | C3m	CRCSPIN	23257	23531	273	23531	273	0	0
		MISCAN	23089	23312	223	23309	220	3	1
	C60 | C9m	CRCSPIN	23258	23531	273	23530	273	1	0
		MISCAN	23089	23312	223	23309	220	3	1
	C60 | C18m	CRCSPIN	23257	23531	273	23530	272	1	0
		MISCAN	23089	23312	223	23308	219	4	2
	C60 | F3m	CRCSPIN	23258	23531	273	23522	264	9	3
		MISCAN	23089	23312	223	23303	214	8	4
	C60 | F9m	CRCSPIN	23257	23531	273	23521	264	9	3
		MISCAN	23089	23312	223	23304	214	8	4
	C60 | F18m	CRCSPIN	23258	23531	273	23522	264	9	3
		MISCAN	23089	23312	223	23302	213	9	4
	C60 | C@65	CRCSPIN	23257	23531	273	23525	268	5	2
		MISCAN	23089	23312	223	23298	209	14	6
	C60 | U	CRCSPIN	23257	23530	273	23422	165	109	40
		MISCAN	23090	23312	223	23187	98	125	56
	F60 | F3m	CRCSPIN	23315	23564	249	23560	245	4	2
		MISCAN	23150	23368	218	23367	218	0	0
	F60 | F9m	CRCSPIN	23315	23565	249	23561	246	3	1
		MISCAN	23149	23367	218	23366	217	1	0
	F60 | F18m	CRCSPIN	23315	23564	249	23558	243	6	3
		MISCAN	23149	23367	218	23367	217	1	0
	F60 | U	CRCSPIN	23316	23565	249	23455	139	110	44
		MISCAN	23149	23367	218	23275	126	92	42
	f60 | F3m	CRCSPIN	23320	23548	228	23545	225	3	1
		MISCAN	23141	23346	205	23344	204	2	1
	f60 | F9m	CRCSPIN	23320	23548	228	23543	224	4	2
		MISCAN	23140	23346	205	23343	203	3	1
	f60 | F18m	CRCSPIN	23319	23548	228	23541	222	6	3
		MISCAN	23140	23345	205	23341	201	4	2
	f60 | U	CRCSPIN	23320	23548	228	23413	93	135	59
		MISCAN	23138	23343	205	23200	62	143	70
	U70 | C3m	CRCSPIN	15973	16088	114	16085	112	2	2
		MISCAN	15748	15856	107	15847	99	9	8
	U70 | C9m	CRCSPIN	15973	16088	114	16081	108	6	6
		MISCAN	15748	15856	107	15843	95	13	12
	U70 | C18m	CRCSPIN	15973	16088	114	16074	101	14	12
		MISCAN	15748	15856	107	15837	88	19	18
	U70 | C@75	CRCSPIN	15973	16088	114	16044	71	43	38
		MISCAN	15748	15856	107	15810	61	46	43
	U70 | F3m	CRCSPIN	15973	16060	87	16059	86	1	1
		MISCAN	15748	15836	87	15829	81	7	8
	U70 | F9m	CRCSPIN	15973	16060	87	16056	82	4	5
		MISCAN	15748	15836	87	15825	77	10	12
	U70 | F18m	CRCSPIN	15973	16060	87	16051	77	9	11
		MISCAN	15748	15836	87	15821	73	15	17
	C70 | C3m	CRCSPIN	15716	15977	261	15977	262	0	0
		MISCAN	15626	15842	216	15840	214	1	1
	C70 | C9m	CRCSPIN	15716	15977	261	15978	262	-1	0
		MISCAN	15626	15842	216	15840	214	2	1
	C70 | C18m	CRCSPIN	15716	15977	261	15977	261	0	0
		MISCAN	15626	15841	216	15839	213	2	1
	C70 | C@75	CRCSPIN	15716	15977	261	15977	261	0	0
		MISCAN	15626	15841	216	15834	208	8	4
	C70 | F3m	CRCSPIN	15716	15978	261	15973	257	5	2
		MISCAN	15626	15842	216	15835	209	6	3
	C70 | F9m	CRCSPIN	15716	15978	261	15974	258	4	1
		MISCAN	15626	15842	216	15834	208	7	3
	C70 | F18m	CRCSPIN	15716	15977	261	15973	257	4	2
		MISCAN	15627	15842	216	15835	209	7	3
	C70 | U	CRCSPIN	15716	15977	261	15938	222	40	15
		MISCAN	15612	15827	215	15741	129	86	40
	F70 | F3m	CRCSPIN	15794	16030	236	16030	236	0	0
		MISCAN	15706	15916	210	15916	210	0	0
	F70 | F9m	CRCSPIN	15794	16030	236	16030	236	1	0
		MISCAN	15705	15915	210	15915	210	0	0
	F70 | F18m	CRCSPIN	15794	16030	236	16029	236	1	0
		MISCAN	15705	15915	210	15915	210	0	0
	F70 | U	CRCSPIN	15795	16031	236	15997	203	34	14
		MISCAN	15705	15916	210	15886	181	30	14
