# Supplementary material for: Projected long-term effects of colorectal cancer screening disruptions following the COVID-19 pandemic
Source: eLife. 2023 May 2;12:e85264. doi: 10.7554/eLife.85264 (PMC10154022; doi:10.7554/eLife.85264)
Supplement: Supplementary file 2. [file elife-85264-supp2.xlsx]

## Sheet: Sup. Table 2 - Cases
Supplementary Table 2 - Projected Lifetime CRC cases per 1,000 individuals
Notes: Outcomes calculated over the lifetime of a cohort of 1000 average-risk, CRC-free individuals with age at pandemic defined in the scenario description. The scenario column describes colorectal cancer screening disruption scenarios, as presented in Table 1. Cases refer to the number of CRC cases computed over the remaining lifespan of individuals starting at the beginning of 2020. Cases aver…
Colonoscopy sensitivity	Scenario	Model	No screening	Screening without disruptions		Screening with disruptions		Cases due to disruptions
			Cases [a]	Cases [b]	Cases averted [a-b]	Cases [c]	Cases averted [a-c]	Cases [c-b]	Risk ratio [c/b]
High	U50 | C3m	CRCSPIN	73.5	17	56.5	17	56.5	0	1
		MISCAN	80.2	34.5	45.8	34.4	45.8	-0.1	1
	U50 | C9m	CRCSPIN	73.5	17	56.5	17	56.5	0	1
		MISCAN	80.2	34.5	45.8	34.4	45.9	-0.1	1
	U50 | C18m	CRCSPIN	73.5	17	56.5	17.4	56.2	0.4	1
		MISCAN	80.2	34.5	45.8	34.4	45.8	-0.1	1
	U50 | C@65	CRCSPIN	73.5	17	56.5	31.8	41.7	14.8	1.9
		MISCAN	80.2	34.5	45.8	45	35.2	10.6	1.3
	U50 | F3m	CRCSPIN	73.5	25.6	47.9	25.8	47.7	0.2	1
		MISCAN	80.2	44.8	35.4	44.7	35.5	-0.1	1
	U50 | F9m	CRCSPIN	73.5	25.6	47.9	25.9	47.6	0.3	1
		MISCAN	80.2	44.8	35.4	44.6	35.6	-0.2	1
	U50 | F18m	CRCSPIN	73.5	25.6	47.9	26.3	47.2	0.7	1
		MISCAN	80.2	44.8	35.4	44.7	35.6	-0.1	1
	U60 | C3m	CRCSPIN	67.9	18.7	49.2	18.9	49	0.2	1
		MISCAN	65.3	29	36.3	29.1	36.2	0.1	1
	U60 | C9m	CRCSPIN	67.9	18.7	49.2	19.3	48.6	0.6	1
		MISCAN	65.3	29	36.3	29.4	35.9	0.4	1
	U60 | C18m	CRCSPIN	67.9	18.7	49.2	20.3	47.6	1.6	1.1
		MISCAN	65.3	29	36.3	29.9	35.4	0.9	1
	U60 | C@65	CRCSPIN	67.9	18.7	49.2	25.1	42.8	6.4	1.3
		MISCAN	65.3	29	36.3	33.5	31.8	4.5	1.2
	U60 | F3m	CRCSPIN	67.9	30.2	37.8	30.4	37.5	0.2	1
		MISCAN	65.3	39.4	25.9	39.5	25.8	0.1	1
	U60 | F9m	CRCSPIN	67.9	30.2	37.8	30.8	37.1	0.7	1
		MISCAN	65.3	39.4	25.9	39.8	25.5	0.4	1
	U60 | F18m	CRCSPIN	67.9	30.2	37.8	31.8	36.2	1.6	1.1
		MISCAN	65.3	39.4	25.9	40.2	25.1	0.8	1
	C60 | C3m	CRCSPIN	67.7	14.2	53.5	14.1	53.5	0	1
		MISCAN	65.2	25.6	39.7	25.6	39.7	0	1
	C60 | C9m	CRCSPIN	67.7	14.2	53.5	14.1	53.5	0	1
		MISCAN	65.2	25.6	39.7	25.5	39.7	0	1
	C60 | C18m	CRCSPIN	67.7	14.2	53.5	14.2	53.5	0	1
		MISCAN	65.2	25.6	39.7	25.6	39.6	0.1	1
	C60 | F3m	CRCSPIN	67.7	14.2	53.5	18.7	48.9	4.5	1.3
		MISCAN	65.2	25.6	39.7	31.6	33.7	6	1.2
	C60 | F9m	CRCSPIN	67.7	14.2	53.5	18.7	49	4.5	1.3
		MISCAN	65.2	25.6	39.7	31.6	33.6	6	1.2
	C60 | F18m	CRCSPIN	67.7	14.2	53.5	18.7	49	4.5	1.3
		MISCAN	65.2	25.6	39.7	31.6	33.7	6	1.2
	C60 | C@65	CRCSPIN	67.7	14.2	53.5	14.1	53.5	0	1
		MISCAN	65.2	25.6	39.7	26.6	38.7	1	1
	C60 | U	CRCSPIN	67.7	14.2	53.5	43.6	24	29.5	3.1
		MISCAN	65.2	25.6	39.7	52	13.3	26.4	2
	F60 | F3m	CRCSPIN	67.8	20.3	47.6	20.9	47	0.6	1
		MISCAN	65.4	32	33.4	32	33.4	0	1
	F60 | F9m	CRCSPIN	67.8	20.3	47.6	21.1	46.8	0.8	1
		MISCAN	65.4	32	33.4	32.1	33.3	0.1	1
	F60 | F18m	CRCSPIN	67.8	20.3	47.6	21.5	46.3	1.2	1.1
		MISCAN	65.4	32	33.4	32.2	33.2	0.2	1
	F60 | U	CRCSPIN	67.8	20.3	47.6	47.5	20.4	27.2	2.3
		MISCAN	65.4	32	33.4	48.1	17.3	16.1	1.5
	f60 | F3m	CRCSPIN	67.9	24.2	43.7	24.8	43.1	0.7	1
		MISCAN	65.4	35.3	30.1	35.3	30.1	0.1	1
	f60 | F9m	CRCSPIN	67.9	24.2	43.7	25.1	42.8	0.9	1
		MISCAN	65.4	35.3	30.1	35.4	30	0.2	1
	f60 | F18m	CRCSPIN	67.9	24.2	43.7	25.4	42.5	1.2	1.1
		MISCAN	65.4	35.3	30.1	35.7	29.7	0.5	1
	f60 | U	CRCSPIN	67.9	24.2	43.7	55.6	12.2	31.5	2.3
		MISCAN	65.4	35.2	30.1	59.7	5.7	24.4	1.7
	U70 | C3m	CRCSPIN	57.5	22.5	35	22.9	34.6	0.4	1
		MISCAN	53.9	28.3	25.6	28.7	25.2	0.4	1
	U70 | C9m	CRCSPIN	57.5	22.5	35	23.9	33.7	1.4	1.1
		MISCAN	53.9	28.3	25.6	29.4	24.5	1.1	1
	U70 | C18m	CRCSPIN	57.5	22.5	35	25.4	32.1	2.9	1.1
		MISCAN	53.9	28.3	25.6	30.7	23.2	2.4	1.1
	U70 | C@75	CRCSPIN	57.5	22.5	35	32.8	24.7	10.3	1.5
		MISCAN	53.9	28.3	25.6	37.2	16.7	8.9	1.3
	U70 | F3m	CRCSPIN	57.5	37.1	20.4	37.5	20.1	0.3	1
		MISCAN	53.9	40.5	13.4	40.7	13.2	0.2	1
	U70 | F9m	CRCSPIN	57.5	37.1	20.4	38	19.5	0.9	1
		MISCAN	53.9	40.5	13.4	41.3	12.7	0.8	1
	U70 | F18m	CRCSPIN	57.5	37.1	20.4	39.1	18.4	2	1.1
		MISCAN	53.9	40.5	13.4	42.1	11.9	1.6	1
	C70 | C3m	CRCSPIN	56.5	13.8	42.7	13.8	42.7	0	1
		MISCAN	53.4	18.9	34.4	18.9	34.5	0	1
	C70 | C9m	CRCSPIN	56.5	13.8	42.7	13.7	42.7	-0.1	1
		MISCAN	53.4	18.9	34.4	18.9	34.4	0	1
	C70 | C18m	CRCSPIN	56.5	13.8	42.7	13.8	42.7	0	1
		MISCAN	53.4	18.9	34.4	19.1	34.3	0.1	1
	C70 | C@75	CRCSPIN	56.5	13.8	42.7	13.8	42.7	0	1
		MISCAN	53.4	18.9	34.4	19.9	33.5	1	1.1
	C70 | F3m	CRCSPIN	56.5	13.8	42.7	16.1	40.4	2.3	1.2
		MISCAN	53.4	18.9	34.4	22.2	31.2	3.2	1.2
	C70 | F9m	CRCSPIN	56.5	13.8	42.7	16.1	40.4	2.3	1.2
		MISCAN	53.4	18.9	34.4	22.2	31.2	3.2	1.2
	C70 | F18m	CRCSPIN	56.5	13.8	42.7	16.1	40.3	2.3	1.2
		MISCAN	53.4	18.9	34.4	22.2	31.1	3.3	1.2
	C70 | U	CRCSPIN	56.5	13.8	42.7	27.5	29	13.7	2
		MISCAN	53.3	18.9	34.4	40.7	12.7	21.8	2.2
	F70 | F3m	CRCSPIN	56.8	18.3	38.5	18.4	38.4	0.1	1
		MISCAN	53.7	23.5	30.1	23.6	30.1	0	1
	F70 | F9m	CRCSPIN	56.8	18.3	38.5	18.4	38.3	0.1	1
		MISCAN	53.7	23.6	30.1	23.7	30	0.1	1
	F70 | F18m	CRCSPIN	56.8	18.3	38.5	18.5	38.3	0.2	1
		MISCAN	53.7	23.6	30.1	23.8	29.9	0.2	1
	F70 | U	CRCSPIN	56.8	18.3	38.5	29.6	27.2	11.3	1.6
		MISCAN	53.7	23.6	30.1	30.6	23.1	7.1	1.3
Low	U50 | C3m	CRCSPIN	73.5	23.8	49.8	23.7	49.9	-0.1	1
		MISCAN	80.2	41.6	38.6	41.6	38.6	0	1
	U50 | C9m	CRCSPIN	73.5	23.8	49.8	23.7	49.9	-0.1	1
		MISCAN	80.2	41.6	38.6	41.6	38.7	-0.1	1
	U50 | C18m	CRCSPIN	73.5	23.8	49.8	24	49.5	0.3	1
		MISCAN	80.2	41.6	38.6	41.6	38.6	-0.1	1
	U50 | C@65	CRCSPIN	73.5	23.8	49.8	37.1	36.4	13.4	1.6
		MISCAN	80.2	41.6	38.6	50.5	29.7	8.9	1.2
	U50 | F3m	CRCSPIN	73.5	31.9	41.7	31.9	41.6	0.1	1
		MISCAN	80.2	50.6	29.6	50.6	29.6	0	1
	U50 | F9m	CRCSPIN	73.5	31.9	41.7	32	41.5	0.1	1
		MISCAN	80.2	50.6	29.6	50.5	29.7	-0.1	1
	U50 | F18m	CRCSPIN	73.5	31.9	41.7	32.4	41.2	0.5	1
		MISCAN	80.2	50.6	29.6	50.6	29.6	0	1
	U60 | C3m	CRCSPIN	67.9	24.8	43.1	25	42.9	0.2	1
		MISCAN	65.3	34.7	30.6	34.8	30.5	0.1	1
	U60 | C9m	CRCSPIN	67.9	24.8	43.1	25.4	42.6	0.6	1
		MISCAN	65.3	34.7	30.6	35	30.3	0.3	1
	U60 | C18m	CRCSPIN	67.9	24.8	43.1	26.3	41.7	1.4	1.1
		MISCAN	65.3	34.7	30.6	35.5	29.8	0.8	1
	U60 | C@65	CRCSPIN	67.9	24.8	43.1	30.5	37.4	5.7	1.2
		MISCAN	65.3	34.7	30.6	38.5	26.8	3.8	1.1
	U60 | F3m	CRCSPIN	67.9	35.3	32.7	35.4	32.6	0.1	1
		MISCAN	65.3	43.5	21.8	43.7	21.7	0.2	1
	U60 | F9m	CRCSPIN	67.9	35.3	32.7	35.8	32.1	0.6	1
		MISCAN	65.3	43.5	21.8	43.8	21.5	0.3	1
	U60 | F18m	CRCSPIN	67.9	35.3	32.7	36.6	31.3	1.4	1
		MISCAN	65.3	43.5	21.8	44.2	21.1	0.7	1
	C60 | C3m	CRCSPIN	67.7	20.3	47.4	20.4	47.3	0	1
		MISCAN	65.3	31.6	33.6	31.6	33.7	0	1
	C60 | C9m	CRCSPIN	67.7	20.3	47.4	20.3	47.4	0	1
		MISCAN	65.3	31.6	33.6	31.6	33.6	0	1
	C60 | C18m	CRCSPIN	67.7	20.3	47.4	20.4	47.3	0.1	1
		MISCAN	65.3	31.6	33.6	31.6	33.6	0	1
	C60 | F3m	CRCSPIN	67.7	20.3	47.4	24.9	42.8	4.6	1.2
		MISCAN	65.3	31.6	33.6	37.3	28	5.7	1.2
	C60 | F9m	CRCSPIN	67.7	20.3	47.4	25	42.7	4.6	1.2
		MISCAN	65.3	31.6	33.6	37.3	27.9	5.7	1.2
	C60 | F18m	CRCSPIN	67.7	20.3	47.4	24.9	42.8	4.5	1.2
		MISCAN	65.3	31.6	33.6	37.3	28	5.6	1.2
	C60 | C@65	CRCSPIN	67.7	20.3	47.4	20.6	47.1	0.3	1
		MISCAN	65.3	31.6	33.6	32.7	32.5	1.1	1
	C60 | U	CRCSPIN	67.7	20.3	47.4	48	19.7	27.6	2.4
		MISCAN	65.3	31.6	33.6	55	10.3	23.4	1.7
	F60 | F3m	CRCSPIN	67.9	26.2	41.6	27	40.9	0.8	1
		MISCAN	65.4	37.2	28.3	37.1	28.3	0	1
	F60 | F9m	CRCSPIN	67.9	26.2	41.6	27	40.9	0.8	1
		MISCAN	65.4	37.2	28.3	37.3	28.2	0.1	1
	F60 | F18m	CRCSPIN	67.9	26.2	41.6	27.7	40.2	1.4	1.1
		MISCAN	65.4	37.2	28.3	37.3	28.2	0.1	1
	F60 | U	CRCSPIN	67.9	26.2	41.6	50.8	17.1	24.5	1.9
		MISCAN	65.4	37.2	28.3	51	14.4	13.8	1.4
	f60 | F3m	CRCSPIN	67.9	29.7	38.2	30.5	37.4	0.9	1
		MISCAN	65.4	39.8	25.6	39.9	25.5	0	1
	f60 | F9m	CRCSPIN	67.9	29.7	38.2	30.7	37.2	1.1	1
		MISCAN	65.4	39.8	25.6	40	25.4	0.1	1
	f60 | F18m	CRCSPIN	67.9	29.7	38.2	31	36.9	1.3	1
		MISCAN	65.4	39.8	25.6	40.2	25.2	0.4	1
	f60 | U	CRCSPIN	67.9	29.7	38.2	57.5	10.3	27.9	1.9
		MISCAN	65.4	39.8	25.6	60.6	4.9	20.7	1.5
	U70 | C3m	CRCSPIN	57.5	27.8	29.8	28.1	29.4	0.3	1
		MISCAN	53.9	32.7	21.2	33.1	20.9	0.3	1
	U70 | C9m	CRCSPIN	57.5	27.8	29.8	28.9	28.6	1.1	1
		MISCAN	53.9	32.7	21.2	33.7	20.3	0.9	1
	U70 | C18m	CRCSPIN	57.5	27.8	29.8	30.2	27.3	2.4	1.1
		MISCAN	53.9	32.7	21.2	34.8	19.1	2.1	1.1
	U70 | C@75	CRCSPIN	57.5	27.8	29.8	36.6	20.9	8.8	1.3
		MISCAN	53.9	32.7	21.2	40.2	13.7	7.5	1.2
	U70 | F3m	CRCSPIN	57.5	40	17.5	40.3	17.2	0.2	1
		MISCAN	53.9	42.7	11.2	43	10.9	0.3	1
	U70 | F9m	CRCSPIN	57.5	40	17.5	40.8	16.7	0.8	1
		MISCAN	53.9	42.7	11.2	43.5	10.5	0.8	1
	U70 | F18m	CRCSPIN	57.5	40	17.5	41.8	15.7	1.8	1
		MISCAN	53.9	42.7	11.2	44.1	9.8	1.4	1
	C70 | C3m	CRCSPIN	56.6	18.7	37.9	18.7	37.9	0	1
		MISCAN	53.5	23.7	29.8	23.7	29.8	0	1
	C70 | C9m	CRCSPIN	56.6	18.7	37.9	18.7	37.9	0	1
		MISCAN	53.5	23.7	29.8	23.7	29.8	0	1
	C70 | C18m	CRCSPIN	56.6	18.7	37.9	18.8	37.8	0.1	1
		MISCAN	53.5	23.7	29.8	23.9	29.6	0.2	1
	C70 | C@75	CRCSPIN	56.6	18.7	37.9	18.7	37.9	0	1
		MISCAN	53.5	23.7	29.8	24.9	28.6	1.2	1
	C70 | F3m	CRCSPIN	56.6	18.7	37.9	21.2	35.4	2.4	1.1
		MISCAN	53.5	23.7	29.8	26.9	26.6	3.2	1.1
	C70 | F9m	CRCSPIN	56.6	18.7	37.9	21.1	35.5	2.4	1.1
		MISCAN	53.5	23.7	29.8	27	26.5	3.3	1.1
	C70 | F18m	CRCSPIN	56.6	18.7	37.9	21.1	35.5	2.4	1.1
		MISCAN	53.5	23.7	29.8	27	26.5	3.3	1.1
	C70 | U	CRCSPIN	56.6	18.7	37.9	31.8	24.8	13.1	1.7
		MISCAN	53.4	23.7	29.8	43	10.5	19.3	1.8
	F70 | F3m	CRCSPIN	56.9	23.3	33.6	23.4	33.5	0.1	1
		MISCAN	53.8	27.6	26.2	27.6	26.2	0	1
	F70 | F9m	CRCSPIN	56.9	23.3	33.6	23.4	33.4	0.2	1
		MISCAN	53.8	27.6	26.2	27.7	26.1	0.1	1
	F70 | F18m	CRCSPIN	56.9	23.3	33.6	23.5	33.4	0.2	1
		MISCAN	53.8	27.6	26.2	27.8	26	0.2	1
	F70 | U	CRCSPIN	56.9	23.3	33.6	33.5	23.4	10.2	1.4
		MISCAN	53.8	27.6	26.2	33.7	20.1	6.1	1.2
