# Supplementary material for: Projected long-term effects of colorectal cancer screening disruptions following the COVID-19 pandemic
Source: eLife. 2023 May 2;12:e85264. doi: 10.7554/eLife.85264 (PMC10154022; doi:10.7554/eLife.85264)
Supplement: Supplementary file 3. [file elife-85264-supp3.xlsx]

## Sheet: Sup. Table 3 - Deaths
Supplementary Table 3 - Projected Lifetime CRC deaths per 1,000 individuals
Notes: Outcomes calculated over the lifetime of a cohort of 1000 average-risk, CRC-free individuals with age at pandemic defined in the scenario description. The scenario column describes colorectal cancer screening disruption scenarios, as presented in Table 1. Deaths refer to the number of CRC deaths computed over the remaining lifespan of individuals starting at the beginning of 2020. Deaths a…
Colonoscopy sensitivity	Scenario	Model	No screening	Screening without disruptions		Screening with disruptions		Deaths due to disruptions
			Deaths [a]	Deaths [b]	Deaths averted [a-b]	Deaths [c]	Deaths averted [a-c]	Deaths [c-b]	Risk ratio [c/b]
High	U50 | C3m	CRCSPIN	30.4	5.8	24.6	5.8	24.6	0	1
		MISCAN	32.4	8.6	23.8	8.7	23.7	0.1	1
	U50 | C9m	CRCSPIN	30.4	5.8	24.6	5.8	24.6	0	1
		MISCAN	32.4	8.6	23.8	8.7	23.7	0.1	1
	U50 | C18m	CRCSPIN	30.4	5.8	24.6	5.9	24.5	0.1	1
		MISCAN	32.4	8.6	23.8	8.7	23.7	0.1	1
	U50 | C@65	CRCSPIN	30.4	5.8	24.6	11.6	18.8	5.8	2
		MISCAN	32.4	8.6	23.8	13.5	18.9	4.9	1.6
	U50 | F3m	CRCSPIN	30.4	8.1	22.3	8.1	22.2	0	1
		MISCAN	32.4	10.2	22.2	10.2	22.2	0	1
	U50 | F9m	CRCSPIN	30.4	8.1	22.3	8.1	22.3	0	1
		MISCAN	32.4	10.2	22.2	10.1	22.3	-0.1	1
	U50 | F18m	CRCSPIN	30.4	8.1	22.3	8.2	22.2	0.1	1
		MISCAN	32.4	10.2	22.2	10.1	22.3	-0.2	1
	U60 | C3m	CRCSPIN	29	7.5	21.5	7.2	21.8	-0.2	1
		MISCAN	27.3	8	19.3	8.3	19	0.3	1
	U60 | C9m	CRCSPIN	29	7.5	21.5	7.5	21.6	0	1
		MISCAN	27.3	8	19.3	8.4	18.9	0.4	1.1
	U60 | C18m	CRCSPIN	29	7.5	21.5	7.8	21.2	0.4	1
		MISCAN	27.3	8	19.3	8.6	18.7	0.6	1.1
	U60 | C@65	CRCSPIN	29	7.5	21.5	9.7	19.3	2.2	1.3
		MISCAN	27.3	8	19.3	10.2	17.1	2.1	1.3
	U60 | F3m	CRCSPIN	29	10.5	18.5	10.4	18.6	-0.2	1
		MISCAN	27.3	10.1	17.2	10.3	17	0.1	1
	U60 | F9m	CRCSPIN	29	10.5	18.5	10.5	18.5	0	1
		MISCAN	27.3	10.1	17.2	10.3	17	0.2	1
	U60 | F18m	CRCSPIN	29	10.5	18.5	10.8	18.2	0.2	1
		MISCAN	27.3	10.1	17.2	10.5	16.8	0.4	1
	C60 | C3m	CRCSPIN	28.9	5.3	23.6	5.2	23.6	0	1
		MISCAN	27.2	6.9	20.3	7	20.2	0.1	1
	C60 | C9m	CRCSPIN	28.9	5.3	23.6	5.2	23.7	0	1
		MISCAN	27.2	6.9	20.3	7	20.2	0.1	1
	C60 | C18m	CRCSPIN	28.9	5.3	23.6	5.2	23.6	0	1
		MISCAN	27.2	6.9	20.3	7	20.2	0.1	1
	C60 | F3m	CRCSPIN	28.9	5.3	23.6	6.5	22.4	1.3	1.2
		MISCAN	27.2	6.9	20.3	8.2	19.1	1.3	1.2
	C60 | F9m	CRCSPIN	28.9	5.3	23.6	6.5	22.4	1.2	1.2
		MISCAN	27.2	6.9	20.3	8.1	19.1	1.2	1.2
	C60 | F18m	CRCSPIN	28.9	5.3	23.6	6.4	22.4	1.2	1.2
		MISCAN	27.2	6.9	20.3	8.1	19.2	1.1	1.2
	C60 | C@65	CRCSPIN	28.9	5.3	23.6	5.2	23.7	-0.1	1
		MISCAN	27.2	6.9	20.3	7.3	19.9	0.4	1.1
	C60 | U	CRCSPIN	28.9	5.3	23.6	17.9	11	12.6	3.4
		MISCAN	27.2	6.9	20.3	20.6	6.6	13.7	3
	F60 | F3m	CRCSPIN	29	7.5	21.5	7.8	21.2	0.3	1
		MISCAN	27.3	8.3	19	8.3	19	-0.1	1
	F60 | F9m	CRCSPIN	29	7.5	21.5	7.8	21.2	0.3	1
		MISCAN	27.3	8.3	19	8.2	19.1	-0.1	1
	F60 | F18m	CRCSPIN	29	7.5	21.5	7.9	21	0.4	1.1
		MISCAN	27.3	8.3	19	8.2	19.2	-0.2	1
	F60 | U	CRCSPIN	29	7.5	21.5	20.1	8.9	12.6	2.7
		MISCAN	27.3	8.3	19	18.4	8.9	10.1	2.2
	f60 | F3m	CRCSPIN	29	8.7	20.3	8.9	20.1	0.2	1
		MISCAN	27.3	8.9	18.4	9	18.3	0.1	1
	f60 | F9m	CRCSPIN	29	8.7	20.3	9	20	0.3	1
		MISCAN	27.3	8.9	18.4	8.9	18.4	0	1
	f60 | F18m	CRCSPIN	29	8.7	20.3	9	20	0.3	1
		MISCAN	27.3	8.9	18.4	8.9	18.4	0	1
	f60 | U	CRCSPIN	29	8.7	20.3	23.7	5.3	15	2.7
		MISCAN	27.3	8.9	18.4	24.1	3.2	15.2	2.7
	U70 | C3m	CRCSPIN	25.8	9.8	16	9.9	15.8	0.2	1
		MISCAN	23.8	9.1	14.7	9.9	13.9	0.8	1.1
	U70 | C9m	CRCSPIN	25.8	9.8	16	10.3	15.5	0.5	1.1
		MISCAN	23.8	9.1	14.7	10.3	13.6	1.1	1.1
	U70 | C18m	CRCSPIN	25.8	9.8	16	10.9	14.9	1.1	1.1
		MISCAN	23.8	9.1	14.7	10.8	13	1.7	1.2
	U70 | C@75	CRCSPIN	25.8	9.8	16	13.9	11.9	4.1	1.4
		MISCAN	23.8	9.1	14.7	13.6	10.3	4.4	1.5
	U70 | F3m	CRCSPIN	25.8	14.3	11.5	14.4	11.3	0.1	1
		MISCAN	23.8	12.6	11.3	13.2	10.7	0.6	1
	U70 | F9m	CRCSPIN	25.8	14.3	11.5	14.6	11.1	0.3	1
		MISCAN	23.8	12.6	11.3	13.4	10.5	0.8	1.1
	U70 | F18m	CRCSPIN	25.8	14.3	11.5	15	10.7	0.7	1.1
		MISCAN	23.8	12.6	11.3	13.8	10.1	1.2	1.1
	C70 | C3m	CRCSPIN	25.3	5.4	19.9	5.4	19.9	0	1
		MISCAN	23.6	5.8	17.8	5.9	17.7	0.1	1
	C70 | C9m	CRCSPIN	25.3	5.4	19.9	5.4	19.9	0	1
		MISCAN	23.6	5.8	17.8	5.9	17.7	0.1	1
	C70 | C18m	CRCSPIN	25.3	5.4	19.9	5.4	19.9	0	1
		MISCAN	23.6	5.8	17.8	5.9	17.7	0.1	1
	C70 | C@75	CRCSPIN	25.3	5.4	19.9	5.4	19.9	0	1
		MISCAN	23.6	5.8	17.8	6.1	17.5	0.3	1.1
	C70 | F3m	CRCSPIN	25.3	5.4	19.9	6.1	19.2	0.7	1.1
		MISCAN	23.6	5.8	17.8	6.7	16.9	0.9	1.2
	C70 | F9m	CRCSPIN	25.3	5.4	19.9	6.1	19.2	0.7	1.1
		MISCAN	23.6	5.8	17.8	6.7	16.9	0.9	1.1
	C70 | F18m	CRCSPIN	25.3	5.4	19.9	6.1	19.2	0.7	1.1
		MISCAN	23.6	5.8	17.8	6.7	16.9	0.9	1.1
	C70 | U	CRCSPIN	25.3	5.4	19.9	11.2	14.1	5.8	2.1
		MISCAN	23.6	5.8	17.8	16.4	7.2	10.6	2.8
	F70 | F3m	CRCSPIN	25.4	7.6	17.8	7.6	17.8	0	1
		MISCAN	23.7	7.4	16.4	7.4	16.4	0	1
	F70 | F9m	CRCSPIN	25.4	7.6	17.8	7.6	17.8	0.1	1
		MISCAN	23.7	7.4	16.4	7.4	16.4	0	1
	F70 | F18m	CRCSPIN	25.4	7.6	17.8	7.6	17.8	0	1
		MISCAN	23.7	7.4	16.4	7.3	16.5	-0.1	1
	F70 | U	CRCSPIN	25.4	7.6	17.8	12.7	12.8	5.1	1.7
		MISCAN	23.7	7.4	16.4	11.7	12	4.4	1.6
Low	U50 | C3m	CRCSPIN	30.4	8.2	22.2	8.1	22.3	-0.1	1
		MISCAN	32.4	10.6	21.8	10.8	21.6	0.2	1
	U50 | C9m	CRCSPIN	30.4	8.2	22.2	8	22.3	-0.1	1
		MISCAN	32.4	10.6	21.8	10.8	21.6	0.1	1
	U50 | C18m	CRCSPIN	30.4	8.2	22.2	8.2	22.2	0	1
		MISCAN	32.4	10.6	21.8	10.8	21.6	0.1	1
	U50 | C@65	CRCSPIN	30.4	8.2	22.2	13.4	17	5.2	1.6
		MISCAN	32.4	10.6	21.8	15	17.4	4.4	1.4
	U50 | F3m	CRCSPIN	30.4	10.3	20.1	10.2	20.2	-0.1	1
		MISCAN	32.4	11.9	20.5	11.9	20.5	0	1
	U50 | F9m	CRCSPIN	30.4	10.3	20.1	10.2	20.2	-0.1	1
		MISCAN	32.4	11.9	20.5	11.8	20.6	0	1
	U50 | F18m	CRCSPIN	30.4	10.3	20.1	10.3	20.1	0	1
		MISCAN	32.4	11.9	20.5	11.7	20.7	-0.1	1
	U60 | C3m	CRCSPIN	29	9.6	19.4	9.4	19.6	-0.2	1
		MISCAN	27.3	9.7	17.6	9.9	17.3	0.3	1
	U60 | C9m	CRCSPIN	29	9.6	19.4	9.6	19.5	0	1
		MISCAN	27.3	9.7	17.6	10	17.3	0.4	1
	U60 | C18m	CRCSPIN	29	9.6	19.4	9.9	19.1	0.3	1
		MISCAN	27.3	9.7	17.6	10.2	17.1	0.6	1.1
	U60 | C@65	CRCSPIN	29	9.6	19.4	11.6	17.4	2	1.2
		MISCAN	27.3	9.7	17.6	11.5	15.8	1.8	1.2
	U60 | F3m	CRCSPIN	29	12.4	16.6	12.2	16.8	-0.2	1
		MISCAN	27.3	11.3	16	11.4	15.8	0.1	1
	U60 | F9m	CRCSPIN	29	12.4	16.6	12.3	16.7	-0.1	1
		MISCAN	27.3	11.3	16	11.5	15.8	0.2	1
	U60 | F18m	CRCSPIN	29	12.4	16.6	12.6	16.4	0.2	1
		MISCAN	27.3	11.3	16	11.6	15.6	0.3	1
	C60 | C3m	CRCSPIN	28.9	7.5	21.4	7.5	21.4	0	1
		MISCAN	27.3	8.7	18.6	8.8	18.4	0.2	1
	C60 | C9m	CRCSPIN	28.9	7.5	21.4	7.5	21.4	0	1
		MISCAN	27.3	8.7	18.6	8.8	18.5	0.1	1
	C60 | C18m	CRCSPIN	28.9	7.5	21.4	7.5	21.4	0	1
		MISCAN	27.3	8.7	18.6	8.8	18.5	0.1	1
	C60 | F3m	CRCSPIN	28.9	7.5	21.4	8.7	20.2	1.2	1.2
		MISCAN	27.3	8.7	18.6	9.8	17.5	1.1	1.1
	C60 | F9m	CRCSPIN	28.9	7.5	21.4	8.7	20.2	1.2	1.2
		MISCAN	27.3	8.7	18.6	9.7	17.6	1	1.1
	C60 | F18m	CRCSPIN	28.9	7.5	21.4	8.6	20.3	1.1	1.1
		MISCAN	27.3	8.7	18.6	9.6	17.6	1	1.1
	C60 | C@65	CRCSPIN	28.9	7.5	21.4	7.5	21.4	0	1
		MISCAN	27.3	8.7	18.6	9.1	18.1	0.5	1.1
	C60 | U	CRCSPIN	28.9	7.5	21.4	19.9	9	12.3	2.6
		MISCAN	27.3	8.7	18.6	22	5.2	13.4	2.5
	F60 | F3m	CRCSPIN	29	9.6	19.3	10	19	0.4	1
		MISCAN	27.3	9.8	17.5	9.8	17.5	0	1
	F60 | F9m	CRCSPIN	29	9.6	19.3	9.9	19	0.3	1
		MISCAN	27.3	9.8	17.5	9.7	17.6	-0.1	1
	F60 | F18m	CRCSPIN	29	9.6	19.3	10.2	18.8	0.5	1.1
		MISCAN	27.3	9.8	17.5	9.6	17.7	-0.2	1
	F60 | U	CRCSPIN	29	9.6	19.3	21.6	7.4	11.9	2.2
		MISCAN	27.3	9.8	17.5	19.6	7.8	9.8	2
	f60 | F3m	CRCSPIN	29	10.7	18.3	11	18	0.3	1
		MISCAN	27.3	10.2	17.1	10.3	17	0.1	1
	f60 | F9m	CRCSPIN	29	10.7	18.3	11	18	0.3	1
		MISCAN	27.3	10.2	17.1	10.2	17.1	0	1
	f60 | F18m	CRCSPIN	29	10.7	18.3	11.1	17.9	0.4	1
		MISCAN	27.3	10.2	17.1	10.2	17.1	0	1
	f60 | U	CRCSPIN	29	10.7	18.3	24.6	4.4	13.9	2.3
		MISCAN	27.3	10.2	17.1	24.6	2.7	14.3	2.4
	U70 | C3m	CRCSPIN	25.8	11.7	14.1	11.8	14	0.1	1
		MISCAN	23.8	10.5	13.4	11.3	12.6	0.8	1.1
	U70 | C9m	CRCSPIN	25.8	11.7	14.1	12.1	13.7	0.4	1
		MISCAN	23.8	10.5	13.4	11.6	12.3	1.1	1.1
	U70 | C18m	CRCSPIN	25.8	11.7	14.1	12.7	13.1	1	1.1
		MISCAN	23.8	10.5	13.4	12	11.8	1.5	1.1
	U70 | C@75	CRCSPIN	25.8	11.7	14.1	15.2	10.6	3.5	1.3
		MISCAN	23.8	10.5	13.4	14.4	9.5	3.9	1.4
	U70 | F3m	CRCSPIN	25.8	15.5	10.3	15.5	10.2	0	1
		MISCAN	23.8	13.2	10.6	13.8	10	0.6	1
	U70 | F9m	CRCSPIN	25.8	15.5	10.3	15.7	10	0.2	1
		MISCAN	23.8	13.2	10.6	14	9.8	0.8	1.1
	U70 | F18m	CRCSPIN	25.8	15.5	10.3	16.1	9.7	0.6	1
		MISCAN	23.8	13.2	10.6	14.3	9.6	1.1	1.1
	C70 | C3m	CRCSPIN	25.4	7.4	18	7.3	18	0	1
		MISCAN	23.7	7.4	16.3	7.5	16.2	0.1	1
	C70 | C9m	CRCSPIN	25.4	7.4	18	7.3	18.1	-0.1	1
		MISCAN	23.7	7.4	16.3	7.5	16.2	0.1	1
	C70 | C18m	CRCSPIN	25.4	7.4	18	7.4	18	0	1
		MISCAN	23.7	7.4	16.3	7.5	16.1	0.1	1
	C70 | C@75	CRCSPIN	25.4	7.4	18	7.4	18	0	1
		MISCAN	23.7	7.4	16.3	7.8	15.8	0.4	1.1
	C70 | F3m	CRCSPIN	25.4	7.4	18	8.1	17.3	0.7	1.1
		MISCAN	23.7	7.4	16.3	8.2	15.5	0.8	1.1
	C70 | F9m	CRCSPIN	25.4	7.4	18	8	17.4	0.6	1.1
		MISCAN	23.7	7.4	16.3	8.2	15.5	0.8	1.1
	C70 | F18m	CRCSPIN	25.4	7.4	18	8	17.4	0.6	1.1
		MISCAN	23.7	7.4	16.3	8.2	15.5	0.8	1.1
	C70 | U	CRCSPIN	25.4	7.4	18	13.2	12.1	5.9	1.8
		MISCAN	23.6	7.4	16.3	17.5	6.1	10.2	2.4
	F70 | F3m	CRCSPIN	25.5	9.7	15.8	9.7	15.8	0	1
		MISCAN	23.8	8.7	15	8.7	15	0	1
	F70 | F9m	CRCSPIN	25.5	9.7	15.8	9.7	15.8	0	1
		MISCAN	23.8	8.7	15	8.7	15.1	-0.1	1
	F70 | F18m	CRCSPIN	25.5	9.7	15.8	9.7	15.8	0	1
		MISCAN	23.8	8.7	15	8.6	15.2	-0.1	1
	F70 | U	CRCSPIN	25.5	9.7	15.8	14.6	10.9	4.9	1.5
		MISCAN	23.8	8.7	15	13	10.8	4.2	1.5
